# Supplementary material for: Time-to-update of systematic reviews relative to the availability of new evidence
Source: Syst Rev. 2018 Nov 17;7:195. doi: 10.1186/s13643-018-0856-9 (PMC6240262; doi:10.1186/s13643-018-0856-9)
Supplement: Supplementary file 1 — List of systematic reviews including new trials. (CSV 24 kb) [file 13643_2018_856_MOESM1_ESM.csv]

SR1_ID	SR2_ID	Trial_ID	New Trial?	Participants in MA2
20614437	23904048	18021264	No	80
20614437	23904048	20467641	No	316
20614437	23904048	20467604	No	105
20614437	23904048	20623038	No	506
20614437	23904048	20553148	Yes	100
20614437	23904048	23406290	Yes	55
20166074	26459238	18841533	No	79
20166074	26459238	11562616	Yes	81
20166074	26459238	22960584	Yes	86
20238333	27226069	12241831	No	1810
20238333	27226069	11419424	No	2220
20238333	27226069	11792138	No	131
20238333	27226069	10475181	No	2457
20238333	27226069	18301136	Yes	313
20238333	27226069	17604045	No	1163
20091584	26984325	NA	Yes	853
20091584	26984325	18325883	No	1649
20091584	26984325	15704516	No	100
20091584	26984325	12093836	No	515
20824871	24919591	19403595	No	60
20824871	24919591	17006066	No	42
20824871	24919591	23542800	Yes	56
20824871	24919591	10325828	No	30
20824871	24919591	19933173	Yes	40
20824871	24919591	11412288	No	40
20614465	27644166	26026936	Yes	150
20614465	27644166	10556107	No	56
20614465	27644166	19196813	No	77
20393951	26384333	16537867	No	19
20393951	26384333	16356437	No	39
20393951	26384333	22147778	Yes	69
20393951	26384333	23509160	Yes	281
20091537	22592687	20435692	Yes	65
20091537	22592687	11473953	No	18
20091537	22592687	11821265	No	32
20238317	27428352	781439	No	51
20238317	27428352	10593672	No	42
20238317	27428352	17942873	No	249
20238317	27428352	NA	No	26
20238317	27428352	18849193	No	416
20238317	27428352	8246650	Yes	53
20238317	27428352	12391494	Yes	58
20238357	23440819	21627422	Yes	568
20238357	23440819	NA	No	160
20238357	23440819	20207251	No	300
20238357	23440819	11152924	No	430
20238357	23440819	15863540	No	308
20091612	25726920	24210533	Yes	165
20091612	25726920	20828584	Yes	452
20091612	25726920	23286595	Yes	496
20091612	25726920	24174612	Yes	846
20091612	25726920	19719796	Yes	444
20091612	25726920	21112451	Yes	273
20091612	25726920	22076554	Yes	726
20091612	25726920	23584193	Yes	476
20091612	25726920	23510102	Yes	430
20091612	25726920	19915080	Yes	139
20091612	25726920	24962451	Yes	409
20091612	25726920	19395686	Yes	785
20091612	25726920	20627440	Yes	218
20091612	25726920	19443788	Yes	110
20091612	25726920	18946771	No	543
20091612	25726920	16182355	No	273
20091612	25726920	NA	No	536
20091612	25726920	11906689	No	60
20091612	25726920	12622686	No	303
20091612	25726920	9531235	No	455
20091612	25726920	10731452	No	100
20091612	25726920	10800431	No	1154
20091612	25726920	15533536	No	1348
20091612	25726920	16873594	No	114
20091612	25726920	18048633	No	4614
20091612	25726920	16298723	No	275
20091612	25726920	17007707	No	200
20091612	25726920	16548939	No	383
20927724	24687239	11742776	No	174
20927724	24687239	21194660	Yes	235
20927724	24687239	15374046	No	71
20927724	24687239	9284784	No	744
20927724	24687239	11315240	No	164
20927724	24687239	11605747	No	548
20927724	24687239	NA	No	72
20927724	24687239	11087879	No	1801
20927724	24687239	17652295	No	1042
20927724	24687239	19137351	No	672
20927724	24687239	8093267	No	665
20927724	24687239	12521969	No	942
20927724	24687239	15381506	No	4117
20927724	24687239	12697798	No	561
20166101	22696379	21694864	Yes	67
20166101	22696379	7742052	No	35
20166101	22696379	9824933	No	34
20166101	22696379	1351276	No	16
20166101	22696379	1733360	No	246
20166101	22696379	7552016	No	247
20166101	22696379	11683740	No	75
20166101	22696379	16132406	No	105
20166101	22696379	1677616	No	24
20166101	22696379	18299182	No	67
20166101	22696379	1455306	No	21
20166101	22696379	7809832	No	218
20166101	22696379	8132136	No	252
20166101	22696379	12691930	No	275
20166101	22696379	16284796	No	54
20166101	22696379	15006886	No	230
20166101	22696379	7527608	No	33
20166101	22696379	10973392	No	211
20824838	23733364	483371	No	52
20824838	23733364	5346629	No	86
20824838	23733364	NA	No	85
20824838	23733364	NA	No	20
20824838	23733364	7636936	No	70
20824838	23733364	12432041	No	301
20824838	23733364	4893958	No	117
20824838	23733364	2626285	No	470
20824838	23733364	7667053	No	56
20824838	23733364	7603807	No	58
20824838	23733364	22346503	No	101
20824838	23733364	3047581	No	100
20824838	23733364	2644815	No	61
20824838	23733364	23054852	Yes	80
20824838	23733364	12133656	No	598
20824838	23733364	18077808	No	435
20824838	23733364	2027357	No	101
20824838	23733364	17968821	No	329
20824838	23733364	9014599	No	89
20824838	23733364	17921553	No	25
20824838	23733364	18077809	No	459
20824838	23733364	8102428	No	115
20824838	23733364	10401941	No	60
20824838	23733364	7770303	No	143
20091578	23235623	16813773	No	232
20091578	23235623	8301766	No	194
20091578	23235623	18283231	No	183
20091578	23235623	17013734	No	527
20091578	23235623	11111630	No	16
20091578	23235623	15213472	No	26
20091578	23235623	14963375	No	27
20091578	23235623	18457800	Yes	639
20687089	25004278	15883262	No	63
20687089	25004278	20200346	No	614
20687089	25004278	12205648	No	44
20687089	25004278	21795660	Yes	406
20824860	23813336	15912203	No	122
20824860	23813336	14656280	No	153
20824860	23813336	12801256	No	66
20824860	23813336	19704064	Yes	200
20091525	27898998	23642400	Yes	50
20091525	27898998	6416514	No	122
20091525	27898998	18407904	No	90
20091525	27898998	20199828	Yes	60
20091525	27898998	14512038	No	109
20091525	27898998	1970070	No	59
20091525	27898998	25045257	Yes	54
20091525	27898998	10205352	No	140
20091525	27898998	22685164	Yes	126
20091525	27898998	3742182	No	58
20091525	27898998	9550459	No	18
20091525	27898998	15637216	No	57
20091525	27898998	15297095	No	40
20091525	27898998	22638708	Yes	152
20091525	27898998	NA	No	10
20091525	27898998	NA	No	32
20091525	27898998	NA	Yes	55
20091525	27898998	16770284	No	80
20091525	27898998	NA	No	30
20091525	27898998	16452913	No	43
20556775	23963794	22305833	Yes	136
20556775	23963794	773507	No	157
20556775	23963794	16007057	No	137
20927746	27056645	12196768	No	259
20927746	27056645	14960519	No	260
20927746	27056645	20179689	Yes	660
20927746	27056645	16767577	No	292
20927746	27056645	16527699	No	198
20927746	27056645	21159889	Yes	1008
20927746	27056645	19139000	No	50
20927728	22513904	3533203	No	50
20927728	22513904	10532600	No	428
20927728	22513904	9293831	No	99
20927728	22513904	9661685	No	84
20927728	22513904	NA	No	214
20927728	22513904	19389209	No	120
20927728	22513904	NA	No	218
20927728	22513904	9971864	No	838
20927728	22513904	7723158	No	69
20927728	22513904	1495291	No	38
20927728	22513904	17442904	No	637
20927728	22513904	10512433	No	127
20927728	22513904	19656349	No	603
20927728	22513904	13374186	No	22
20927728	22513904	17894791	No	60
20927728	22513904	22168590	Yes	2016
20927728	22513904	20940381	Yes	502
20614429	24671929	23868890	Yes	168
20614429	24671929	22924451	Yes	169
20614429	24671929	15644016	No	197
20614429	24671929	15141368	No	237
20614429	24671929	12814414	No	149
20614429	24671929	16473379	No	102
20614429	24671929	20855414	No	119
20238315	23821359	1901083	No	22
20238315	23821359	NA	No	60
20238315	23821359	8160279	No	44
20238315	23821359	3195529	No	60
20238315	23821359	21962214	Yes	2047
20238315	23821359	NA	No	60
20238315	23821359	10745332	No	50
20238315	23821359	7302548	No	82
20166060	22895919	786665	No	69
20166060	22895919	7011836	No	495
20166060	22895919	NA	No	19
20166060	22895919	6350033	No	203
20166060	22895919	6376210	No	121
20166060	22895919	3907681	No	109
20166060	22895919	2866607	No	148
20166060	22895919	NA	No	181
20166060	22895919	3516537	No	41
20166060	22895919	3541091	No	613
20166060	22895919	3299567	No	214
20166060	22895919	3329530	No	453
20166060	22895919	3294038	No	91
20166060	22895919	NA	No	60
20166060	22895919	NA	No	83
20166060	22895919	7972979	No	129
20166060	22895919	8739489	No	441
20166060	22895919	NA	No	295
20166060	22895919	10337455	No	246
20166060	22895919	14643168	No	234
20166060	22895919	15553660	No	124
20166060	22895919	15866309	No	523
20166060	22895919	18555912	No	707
20166060	22895919	19624838	Yes	220
20166060	22895919	19138505	Yes	192
20166060	22895919	10575333	No	69
21069670	23728637	8853758	No	209
21069670	23728637	9581986	No	261
21069670	23728637	19392864	Yes	929
21069670	23728637	16240208	No	252
21069670	23728637	14616151	No	717
21069670	23728637	9361168	No	509
21069670	23728637	10871975	No	359
21069670	23728637	21538030	Yes	155
21069670	23728637	18807128	No	281
21069670	23728637	9203934	No	38
20687083	26517969	21956192	Yes	715
20687083	26517969	21962415	Yes	605
20687083	26517969	NA	No	34
20687083	26517969	19629314	Yes	40
20687083	26517969	NA	No	133
20687083	26517969	21080835	Yes	1653
20687083	26517969	NA	No	258
20687083	26517969	NA	No	462
20687083	26517969	NA	No	127
20687083	26517969	21308343	Yes	120
20687083	26517969	NA	No	1069
20687083	26517969	NA	No	181
20687083	26517969	NA	No	1518
20687083	26517969	23061492	Yes	405
20687083	26517969	NA	No	287
20687083	26517969	NA	No	254
20687083	26517969	NA	No	38
20687083	26517969	NA	No	358
20687083	26517969	NA	No	406
20687083	26517969	NA	No	276
20687083	26517969	NA	No	148
20687083	26517969	NA	No	135
20393936	23633310	16547381	No	35
20393936	23633310	NA	No	23
20393936	23633310	17484080	No	21
20393936	23633310	14700149	No	30
20393936	23633310	17937843	No	36
20393936	23633310	16219273	No	47
20393936	23633310	18458658	Yes	63
20393936	23633310	12014386	No	175
20393936	23633310	9386657	No	16
20393936	23633310	7616831	No	33
20393936	23633310	10625080	No	33
20393936	23633310	10586177	No	17
20393936	23633310	NA	No	41
20393936	23633310	18561728	No	20
20393936	23633310	NA	No	41
20393936	23633310	14651538	No	63
20393936	23633310	17768157	No	119
20393936	23633310	12549803	No	18
20393936	23633310	9175948	No	40
20393936	23633310	10974130	No	148
20166094	27670244	9408812	No	49
20166094	27670244	15039761	No	60
20166094	27670244	16930863	No	106
20166094	27670244	16461866	No	106
20166094	27670244	12233989	No	48
20166094	27670244	12873248	No	30
20166094	27670244	18551884	No	70
20166094	27670244	26777774	Yes	57
20238330	24500904	9007770	No	18
20238330	24500904	16445331	No	54
20238330	24500904	NA	No	44
20238330	24500904	11307132	No	60
20238330	24500904	NA	No	60
20238330	24500904	NA	No	19
20238330	24500904	1512910	No	92
20238330	24500904	NA	No	32
20238330	24500904	NA	Yes	28
20238330	24500904	18608367	Yes	63
20393935	24771460	15718182	No	200
20393935	24771460	10069785	No	99
20393935	24771460	22999730	Yes	123
20393935	24771460	16194620	Yes	43
20393935	24771460	17981851	No	50
20393935	24771460	1935194	No	2330
20091618	26282071	22815970	Yes	30
20091618	26282071	20846961	Yes	75
20091618	26282071	20042423	Yes	152
20091618	26282071	NA	No	251
20091618	26282071	17084927	No	104
20091618	26282071	17767899	No	525
20091618	26282071	15951880	No	29
20091604	24482121	17466698	No	60
20091604	24482121	1879595	No	44
20091604	24482121	22086108	Yes	83
20091604	24482121	21796421	Yes	106
21154370	24297303	16035063	No	18
21154370	24297303	16933235	No	24
21154370	24297303	23356386	Yes	11
21069707	26503498	20435345	No	207781
21069707	26503498	20776417	No	550
21069707	26503498	10037634	No	30110
21069707	26503498	21586714	Yes	60294
20614449	28103638	24764615	Yes	41
20614449	29703778	25318784	Yes	20
20614449	31303918	NA	Yes	20
20614449	32904058	NA	Yes	30
20614449	34504198	3410578	Yes	25
20614449	36104338	24284453	Yes	16
20614449	37704478	9349677	No	20
20614449	39304618	17426347	No	78
20614449	40904758	NA	Yes	18
20091611	27977041	24412468	Yes	286
20091611	27977041	12860772	No	198
20091611	27977041	16797162	No	223
20091521	26224322	NA	No	93
20091521	26224322	17240224	No	10
20091521	26224322	10451565	No	24
20091521	26224322	8520806	No	60
20091521	26224322	6996107	No	51
20091521	26224322	24778782	Yes	84
21154348	25855820	9364884	No	89
21154348	25855820	NA	No	30
21154348	25855820	NA	No	69
21154348	25855820	12461499	No	99
21154348	25855820	19953579	Yes	109
21154348	25855820	19537014	Yes	35
21154348	25855820	16082697	Yes	48
21154348	25855820	11983043	No	19
21154348	25855820	1533504	No	55
21154348	25855820	9695300	No	104
21154348	25855820	8283363	No	128
21154348	25855820	8190575	No	76
21154348	25855820	2019938	No	83
21154348	25855820	1513726	No	25
21154348	25855820	1558072	No	37
20556747	23633304	8549944	No	63
20556747	23633304	8335191	No	42
20556747	23633304	4597093	No	26
20556747	23633304	6102739	No	72
20556747	23633304	4107900	No	12
20556747	23633304	9399753	No	58
20556747	23633304	4143532	No	16
20556747	23633304	38176	No	136
20556747	23633304	18671816	Yes	81
20614425	25517473	6338992	No	200
20614425	25517473	6208877	Yes	160
20614425	25517473	788855	No	95
20614425	25517473	861482	No	140
20614425	25517473	3672322	Yes	156
20614425	25517473	6998538	Yes	196
20614425	25517473	5117008	No	95
20614425	25517473	4016545	Yes	176
20614425	25517473	1702235	Yes	160
20824824	22895914	NA	No	1608
20824824	22895914	21749629	Yes	1111
20824824	22895914	19489810	No	61
20824824	22895914	11065032	No	200
20824824	22895914	7819846	No	2463
20824824	22895914	8494832	No	3510
20393937	27378324	16762775	No	0
20393937	27378324	10963245	No	0
20393937	27378324	12401823	No	49
20393937	27378324	16216821	No	617
20393937	27378324	14638565	No	157
20393937	27378324	11465228	No	1155
20393937	27378324	15630104	No	737
20393937	27378324	9917117	No	165
20393937	27378324	11722037	No	82
20393937	27378324	17334508	No	195
20393937	27378324	15457308	No	139
20393937	27378324	15747040	No	202
20393937	27378324	24083884	Yes	310
20393937	27378324	19041254	Yes	58
20393937	27378324	23033226	Yes	114
20824861	28146605	15706548	No	31
20824861	28146605	22750962	Yes	25
20824861	28146605	16944823	No	10
20824861	28146605	11676788	No	23
20824861	28146605	16719026	No	32
20824861	28146605	17132119	Yes	14
20824861	28146605	18047458	Yes	40
20824861	28146605	19194671	No	30
20824861	28146605	12601664	No	25
20824861	28146605	17122432	No	42
20824861	28146605	16180595	Yes	23
21069697	25803792	20362800	No	29889
21069697	25803792	15364188	No	6125
21069697	25803792	20207411	No	18207
21069697	25803792	24030269	Yes	19986
21069697	25803792	23689475	Yes	17421
21069697	25803792	23683639	Yes	9570
20556754	25101364	21651392	No	575
20556754	25101364	21570549	Yes	215
20556754	25101364	22067762	No	88
20091507	23440778	11953541	Yes	60
20091507	23440778	19490299	Yes	50
20091507	23440778	7565975	No	282
20091507	23440778	8289096	No	98
20091507	23440778	11322670	No	340
20091507	23440778	8185149	No	142
20091507	23440778	1737315	No	267
20091507	23440778	12695272	No	256
20091507	23440778	3678895	No	79
20091507	23440778	19189907	No	738
20091507	23440778	12021683	No	157
20091507	23440778	18452048	No	96
20091507	23440778	22091692	Yes	665
20091507	23440778	NA	No	97
21154388	26171898	15233397	Yes	63
21154388	26171898	16002810	No	117
21154388	26171898	11694666	No	58
20091516	24825456	10529659	No	50
20091516	24825456	7936832	No	40
20091516	24825456	8653433	No	248
20091516	24825456	11150359	Yes	220
20091516	24825456	9462187	No	42
20091516	24825456	10585975	No	26
20091516	24825456	9310536	No	262
20091559	22696339	17679629	No	53
20091559	22696339	8805966	No	20
20091559	22696339	NA	No	36
20091559	22696339	21262413	Yes	40
20091559	22696339	9300508	No	25
20091559	22696339	10209659	No	56
20091559	22696339	10396013	No	54
20091512	23440783	12464757	No	128
20091512	23440783	9925903	No	31
20091512	23440783	20817247	Yes	44
20091512	23440783	10393997	No	61
20556755	22786476	11528165	No	41
20556755	22786476	21745374	Yes	41
20556755	22786476	1552913	No	147
20556755	22786476	8559353	No	44
20556755	22786476	NA	No	43
20556755	22786476	9014908	No	251
20091632	23235641	16764623	No	106
20091632	23235641	18606439	Yes	141
20091632	23235641	17493669	No	288
20091632	23235641	12691318	No	192
20091632	23235641	9345358	No	210
20091632	23235641	NA	No	134
20824873	24729198	16753335	No	14
20824873	24729198	18779511	No	30
20824873	24729198	19594842	No	4
20824873	24729198	18047871	No	12
20824873	24729198	16495011	No	20
20824873	24729198	19801069	No	11
20824873	24729198	11601430	No	14
20824873	24729198	11588611	No	18
20824873	24729198	15026508	No	60
20824873	24729198	17101886	No	22
20824873	24729198	18223016	No	46
20824873	24729198	17872930	No	30
20824873	24729198	14746870	No	10
20824873	24729198	12138303	No	12
20824873	24729198	23623156	Yes	64
20824873	24729198	21397400	Yes	40
20824873	24729198	24755729	Yes	19
20824873	24729198	21342747	Yes	45
20824873	24729198	21764215	Yes	20
20927743	27012320	17391562	No	279
20927743	27012320	8772901	No	598
20927743	27012320	16251628	No	546
20927743	27012320	16885772	No	4601
20927743	27012320	20842169	Yes	66
20614438	23450556	18381542	No	34
20614438	23450556	21332800	Yes	202
20091561	26397370	12356613	No	269
20091561	26397370	20801246	Yes	177
20091588	21735402	15200846	No	990
20091588	21735402	16014825	No	115
20091588	21735402	12737864	No	254
20091588	21735402	15473141	No	286
20091588	21735402	15030685	No	375
20091588	21735402	15061941	No	257
20091588	21735402	19284644	Yes	748
20091616	22419319	18056558	No	72
20091616	22419319	20618098	Yes	80
21154395	22161428	18525027	No	26
21154395	22161428	20150398	No	45
21154395	22161428	21742556	Yes	307
20927772	23963766	18794427	No	148
20927772	23963766	21440263	Yes	94
20927772	23963766	21704290	Yes	293
